# Supplementary material
Source: MDPI journal article supplement (https://www.mdpi.com/2077-0472/12/5/630)
Supplement: s1 [file s1]

# Dissipation dynamics and dietary risk assessment of four fungicides as preservatives in pear

Yongfeng Tang<sup>1</sup>, Kuikui Hu<sup>1</sup>, Xiaomeng Li<sup>1</sup>, Chaogang Liu<sup>2</sup>, Yanhui Xu<sup>3</sup>, Zhaoxian Zhang<sup>1</sup>, Xiangwei Wu<sup>1\*</sup>

<sup>1</sup> College of Resources and Environment, Anhui Agricultural University, Key Laboratory of Agri-food Safety of Anhui Province, Hefei 230036, China; E-mail: wxw@ahau.edu.cn; xiangweiwu@126.com.

<sup>2</sup> Dangshan Sanlian fruit and vegetable professional cooperative, Tangshan 235300, China; E-mail:755769822@qq.com

<sup>3</sup> Anhui Public Inspection Institute Co., Ltd., Hefei 230051, China; 32596690@qq.com

\* Correspondence: Tel/Fax: +86-551-65786320; E-mail: wxw@ahau.edu.cn; [xiangweiwu@126.com](mailto:xiangweiwu@126.com).

**Table S1.** Gradient elution program of chromatographic column.

| Time (min) | Flow rate (mL/min) | Phase A (%) | Phase B (%) |
|------------|--------------------|-------------|-------------|
| Initial    | 0.300              | 40.0        | 60.0        |
| 0.25       | 0.300              | 40.0        | 60.0        |
| 2.00       | 0.300              | 10.0        | 90.0        |
| 3.50       | 0.300              | 10.0        | 90.0        |
| 3.51       | 0.300              | 40.0        | 60.0        |
| 5.00       | 0.300              | 40.0        | 60.0        |

**Table S2.** Mass parameters for the analysis of five fungicides.

| Fungicides         | Parent ion (m/z) | Daughter ion (m/z) | Dwell time (s) | Cone voltage (V) | Collision voltage (V) |
|--------------------|------------------|--------------------|----------------|------------------|-----------------------|
| Thiophanate-methyl | 343              | 93                 | 0.03           | 20               | 46                    |
|                    | 343              | 150.91*            | 0.03           | 20               | 18                    |
| Carbendazim        | 192.1            | 132.1              | 0.045          | 24               | 28                    |
|                    | 192.1            | 160.1*             | 0.045          | 24               | 18                    |
| Pyraclostrobin     | 388.1            | 163.0*             | 0.045          | 20               | 25                    |
|                    | 388.1            | 193.9              | 0.045          | 20               | 12                    |
| Tebuconazole       | 308              | 70.1               | 0.045          | 31               | 22                    |
|                    | 308              | 125*               | 0.045          | 31               | 40                    |
| Difenoconazole     | 406              | 111.1              | 0.163          | 40               | 60                    |
|                    | 406              | 215.1*             | 0.163          | 40               | 25                    |

\*Quantitative ion

**Table S3.** The information on meteorological conditions during sampling.

| Date                      | Temperature (°C) | Weather    | Wind (m/s) |
|---------------------------|------------------|------------|------------|
| Aug 18, 2021              | 21-31            | Cloudy     | 2.3        |
| Aug 19, 2021              | 23-31            | Overcast   | 3.1        |
| Aug 20, 2021              | 21-25            | Cloudy     | 4.3        |
| Aug 21, 2021              | 22-30            | Cloudy     | 2.8        |
| Aug 22, 2021              | 22-27            | Light rain | 1.9        |
| Aug 23, 2021              | 21-23            | Cloudy     | 3.4        |
| Aug 24, 2021              | 20-30            | Sunny      | 2.0        |
| Aug 25, 2021              | 23-31            | Cloudy     | 4.1        |
| Aug 26, 2021              | 18-24            | Light rain | 5.2        |
| Aug 27, 2021              | 18-21            | Cloudy     | 3.2        |
| Aug 28, 2021              | 18-23            | Light rain | 2.5        |
| Aug 29, 2021              | 20-25            | Light rain | 2.8        |
| Aug 30, 2021              | 21-25            | Cloudy     | 2.3        |
| Aug 31, 2021 <sup>a</sup> | 20-28            | Cloudy     | 2.1        |

<sup>a</sup> Date of pesticide application and fruit sampling.

**Table S4.** The fortified recoveries of five fungicides in pears.

| Fungicides             | Spiked level<br>(mg/kg) | Recovery (%) (n=5) |       |       |       |       | Average<br>recovery<br>(%) | RSD<br>(%) |
|------------------------|-------------------------|--------------------|-------|-------|-------|-------|----------------------------|------------|
|                        |                         | 1                  | 2     | 3     | 4     | 5     |                            |            |
| Carbendazim            | 0.01                    | 82.1               | 101.9 | 90.6  | 88.2  | 89.4  | 90.4                       | 7.2        |
|                        | 0.1                     | 104.7              | 104.3 | 105.4 | 105.3 | 112.2 | 106.4                      | 3.3        |
|                        | 1                       | 94.3               | 94.1  | 95.1  | 94.7  | 95.3  | 94.7                       | 0.5        |
|                        | 10                      | 93.2               | 96.1  | 94.5  | 97.5  | 97.6  | 95.8                       | 1.9        |
|                        | 50                      | 91.0               | 90.5  | 90.6  | 90.8  | 94.7  | 91.5                       | 1.8        |
| Tebuconazole           | 0.01                    | 89.2               | 93.3  | 92.7  | 88.6  | 84.7  | 89.7                       | 3.5        |
|                        | 0.1                     | 92.9               | 92.8  | 96.8  | 95.3  | 98.6  | 95.3                       | 2.5        |
|                        | 1                       | 88.2               | 87.1  | 85.9  | 91.4  | 89.4  | 88.4                       | 2.1        |
|                        | 10                      | 88.7               | 87.3  | 86.9  | 91.5  | 90.0  | 88.9                       | 1.9        |
|                        | 50                      | 84.9               | 83.6  | 83.3  | 84.3  | 88.2  | 84.8                       | 2.0        |
| Thiophanate-<br>methyl | 0.01                    | 96.6               | 83.1  | 99.6  | 97.6  | 95.0  | 94.4                       | 6.5        |
|                        | 0.1                     | 81.1               | 83.2  | 73.7  | 74.4  | 73.2  | 77.1                       | 4.7        |
|                        | 1                       | 84.9               | 89.4  | 88.2  | 90.5  | 89.3  | 88.5                       | 2.2        |
|                        | 10                      | 90.3               | 91.5  | 90.5  | 95.1  | 93.6  | 92.2                       | 2.1        |
|                        | 50                      | 89.8               | 89.8  | 90.2  | 92.5  | 94.8  | 91.4                       | 2.2        |
| Pyraclostrobin         | 0.01                    | 89.9               | 91.1  | 90.4  | 93.0  | 93.9  | 91.7                       | 1.7        |
|                        | 0.1                     | 99.1               | 105.8 | 105.2 | 113.7 | 105.4 | 105.8                      | 5.2        |
|                        | 1                       | 97.5               | 106.3 | 113.3 | 103.4 | 102.4 | 104.6                      | 5.8        |
|                        | 10                      | 97.3               | 95.7  | 94.2  | 97.5  | 98.0  | 96.5                       | 1.6        |
|                        | 50                      | 87.0               | 86.5  | 88.0  | 89.0  | 92.1  | 88.5                       | 2.2        |
| Difenoconazole         | 0.01                    | 114.8              | 109.6 | 108.4 | 116.4 | 108.8 | 111.6                      | 3.7        |
|                        | 0.1                     | 107.7              | 110.7 | 112.9 | 111.5 | 117.1 | 112.0                      | 3.4        |
|                        | 1                       | 95.3               | 95.7  | 93.2  | 97.3  | 95.7  | 95.4                       | 1.5        |
|                        | 10                      | 92.2               | 93.6  | 90.7  | 97.5  | 95.6  | 93.9                       | 2.7        |
|                        | 50                      | 87.8               | 86.3  | 85.1  | 86.2  | 90.0  | 87.1                       | 1.9        |

**Table S5.** Residues of the fungicides in pear samples from 18 different refrigerated warehouses

| Cold storage          | Residue concentration (mg/kg) |              |                    |                |                |
|-----------------------|-------------------------------|--------------|--------------------|----------------|----------------|
|                       | Carbendazim                   | Tebuconazole | Thiophanate-methyl | Pyraclostrobin | Difenoconazole |
| 1                     | 0.11±0.02                     | 0.11±0.01    | 0.02±0.00          | 0.07±0.01      | 0.13±0.01      |
| 2                     | 0.04±0.00                     | 0.10±0.01    | 0.01±0.00          | 0.01±0.00      | 0.06±0.00      |
| 3                     | 0.03±0.01                     | 0.01±0.01    | <0.01              | <0.01          | 0.01±0.00      |
| 4                     | 0.02±0.01                     | 0.02±0.01    | 0.01±0.01          | <0.01          | <0.01          |
| 5                     | 0.06±0.03                     | 0.02±0.01    | <0.01              | 0.02±0.00      | <0.01          |
| 6                     | 0.34±0.01                     | 0.04±0.05    | 0.02±0.01          | 0.02±0.01      | 0.01±0.00      |
| 7                     | 0.04±0.02                     | <0.01        | <0.01              | 0.02±0.00      | <0.01          |
| 8                     | 0.16±0.01                     | 0.02±0.02    | 0.01±0.00          | <0.01          | <0.01          |
| 9                     | 14.84±0.36                    | 0.07±0.00    | 6.22±0.12          | 0.39±0.02      | 0.28±0.01      |
| 10                    | 4.84±0.26                     | 0.55±0.03    | 0.03±0.00          | 0.35±0.03      | 0.01±0.00      |
| 11                    | 11.39±0.27                    | 0.10±0.01    | 4.83±0.26          | 0.24±0.01      | 0.01±0.00      |
| 12                    | 3.93±0.10                     | 0.28±0.01    | 0.06±0.01          | 0.23±0.01      | <0.01          |
| 13                    | 11.96±0.86                    | 0.30±0.03    | 1.40±0.05          | 0.17±0.01      | 0.11±0.01      |
| 14                    | 16.75±0.62                    | 0.11±0.01    | 7.35±0.39          | 0.52±0.05      | 0.01±0.00      |
| 15                    | 30.05±0.75                    | 0.07±0.01    | 13.55±0.45         | <0.01          | 0.05±0.00      |
| 16                    | 12.19±0.81                    | 0.12±0.00    | 4.48±0.21          | 0.41±0.03      | 0.01±0.00      |
| 17                    | 11.83±0.40                    | 0.04±0.01    | 4.50±0.22          | <0.01          | 0.04±0.00      |
| 18                    | 7.73±0.46                     | 0.07±0.02    | 2.98±0.23          | 0.28±0.01      | 0.01±0.00      |
| Maximum concentration | 30.05                         | 0.55         | 13.55              | 0.52           | 0.28           |
| STRM                  | 3.88                          | 0.07         | 0.05               | 0.03           | 0.01           |
| Positive rate         | 100.0%                        | 94.4%        | 83.3%              | 72.2%          | 72.2%          |

**Table S6.** Residues of the fungicides in commercial pear samples from the supermarket.

| Market                | Residue concentration (mg/kg) |              |                    |                |                |
|-----------------------|-------------------------------|--------------|--------------------|----------------|----------------|
|                       | Carbendazim                   | Tebuconazole | Thiophanate-methyl | Pyraclostrobin | Difenoconazole |
| 1                     | 0.10±0.01                     | 0.07±0.00    | 0.28±0.02          | <0.01          | 0.20±0.01      |
| 2                     | 0.06±0.00                     | <0.01        | 0.26±0.00          | <0.01          | 0.09±0.00      |
| 3                     | 0.26±0.05                     | 0.25±0.04    | 0.45±0.03          | 3.36±0.026     | 0.32±0.05      |
| 4                     | 1.03±0.03                     | 0.35±0.01    | 1.06±0.19          | 0.97±0.05      | 0.91±0.03      |
| 5                     | 0.41±0.07                     | 0.13±0.01    | 1.30±0.20          | 0.55±0.03      | 0.49±0.06      |
| 6                     | 0.07±0.00                     | <0.01        | 0.18±0.15          | <0.01          | 0.06±0.00      |
| 7                     | 0.07±0.00                     | <0.01        | 0.26±0.00          | <0.01          | 0.05±0.00      |
| 8                     | 0.08±0.01                     | <0.01        | 8.44±1.30          | 0.40±0.06      | 0.06±0.00      |
| 9                     | 0.10±0.01                     | 0.08±0.01    | 1.28±0.35          | <0.01          | 0.22±0.04      |
| 10                    | 0.17±0.04                     | 0.17±0.01    | 0.54±0.02          | 0.58±0.03      | 0.40±0.04      |
| 11                    | 0.08±0.01                     | <0.01        | 0.29±0.03          | <0.01          | 0.14±0.02      |
| 12                    | 0.10±0.02                     | 0.06±0.00    | 0.17±0.04          | <0.01          | 0.16±0.00      |
| 13                    | 0.40±0.07                     | 0.14±0.00    | 1.06±0.12          | 1.55±0.00      | 0.54±0.01      |
| 14                    | 0.14±0.02                     | 0.07±0.04    | <0.01              | <0.01          | 0.05±0.00      |
| 15                    | 0.07±0.00                     | <0.01        | <0.01              | <0.01          | 0.06±0.00      |
| 16                    | 0.07±0.00                     | <0.01        | <0.01              | <0.01          | 0.08±0.00      |
| 17                    | 0.08±0.00                     | 0.45±0.05    | <0.01              | 0.46±0.04      | 0.10±0.01      |
| 18                    | 1.36±0.16                     | 2.08±0.27    | 1.31±0.29          | 4.93±0.36      | 7.00±1.14      |
| 19                    | 1.11±0.05                     | 1.71±0.05    | 1.07±0.04          | 10.12±0.56     | 2.25±0.31      |
| 20                    | 5.68±0.26                     | 1.89±0.13    | <0.01              | 4.26±0.77      | 2.55±0.34      |
| 21                    | 0.38±0.06                     | 0.45±0.03    | <0.01              | 5.06±0.59      | 1.36±0.43      |
| 22                    | 3.05±0.07                     | 0.89±0.06    | 1.31±0.11          | 45.93±2.73     | 1.03±0.08      |
| 23                    | 1.74±0.16                     | 1.07±0.20    | 0.69±0.04          | 23.47±3.59     | 23.04±1.77     |
| 24                    | 0.21±0.00                     | 0.40±0.04    | <0.01              | 1.86±0.90      | 1.46±0.33      |
| Maximum concentration | 5.68                          | 2.08         | 8.44               | 45.93          | 23.04          |
| STRM                  | 0.16                          | 0.14         | 0.29               | 0.51           | 0.27           |
| Positive rate         | 100%                          | 70.8%        | 70.8%              | 58.3%          | 100%           |

**Table S7.** Dietary intake risk assessment of thiophanate-methyl on the basis of the residues from 18 different refrigerated warehouses.

| Food classification            | Fi <sup>a</sup> | Reference<br>residue<br>Limit or<br>STMR <sup>b</sup> | Sources | NMDI (mg) | ADI<br>(mg/kg)      | Risk<br>quotient<br>(%) |
|--------------------------------|-----------------|-------------------------------------------------------|---------|-----------|---------------------|-------------------------|
| Rice and its products          | 0.2399          | 1                                                     | China   | 0.239900  | ADI×bw <sup>c</sup> |                         |
| Flour and its products         | 0.1385          | 0.5                                                   | China   | 0.069250  |                     |                         |
| Other grains                   | 0.0233          |                                                       |         |           |                     |                         |
| Tubers                         | 0.0495          | 0.1                                                   | China   | 0.004950  |                     |                         |
| Dried beans and their products | 0.016           |                                                       |         |           |                     |                         |
| Dark vegetables                | 0.0915          | 3                                                     | China   | 0.274500  |                     |                         |
| Light vegetable                | 0.1837          | 0.5                                                   | China   | 0.091850  |                     |                         |
| Pickles                        | 0.0103          |                                                       |         |           |                     |                         |
| Fruits                         | 0.0457          | 3.88                                                  | China   | 0.177316  |                     |                         |
| Nuts                           | 0.0039          | 0.05                                                  | China   | 0.000195  |                     |                         |
| Livestock and poultry          | 0.0795          |                                                       |         |           |                     |                         |
| Milk and its products          | 0.0263          |                                                       |         |           |                     |                         |
| Egg and its products           | 0.0236          |                                                       |         |           |                     |                         |
| Fish and shrimp                | 0.0301          |                                                       |         |           |                     |                         |
| Vegetable oil                  | 0.0327          | 0.1                                                   | China   | 0.003270  |                     |                         |
| Animal oil                     | 0.0087          |                                                       |         |           |                     |                         |
| Sugar, starch                  | 0.0044          |                                                       |         |           |                     |                         |
| Salt                           | 0.012           |                                                       |         |           |                     |                         |
| Soy sauce                      | 0.009           |                                                       |         |           |                     |                         |
| Total                          | 1.0286          |                                                       |         | 0.861231  | 5.67                | 15.19%                  |

a Fi referred to the daily intake of a certain agricultural product or food in China (kg),

b STMRi (mg/kg) supervised trials median residue,

c bw was the mean of average body weight of Chinese adult (63 kg).

**Table S8.** Dietary intake risk assessment of tebuconazole on the basis of the residues from 18 different refrigerated warehouses.

| Food classification            | Fi (kg) | Reference residue Limit or STMR | Sources | NMDI (mg) | ADI (mg/kg) | Risk quotient (%) |
|--------------------------------|---------|---------------------------------|---------|-----------|-------------|-------------------|
| Rice and its products          | 0.2399  | 0.1                             | China   | 0.023990  | ADI×63      |                   |
| Flour and its products         | 0.1385  | 2                               | China   | 0.277000  |             |                   |
| Other grains                   | 0.0233  | 0.05                            | China   | 0.001165  |             |                   |
| Tubers                         | 0.0495  |                                 |         |           |             |                   |
| Dried beans and their products | 0.016   |                                 |         |           |             |                   |
| Dark vegetables                | 0.0915  | 2                               | China   | 0.183000  |             |                   |
| Light vegetable                | 0.1837  | 7                               | China   | 1.285900  |             |                   |
| Pickles                        | 0.0103  |                                 |         |           |             |                   |
| Fruits                         | 0.0457  | 0.07                            | China   | 0.003199  |             |                   |
| Nuts                           | 0.0039  | 0.05                            | China   | 0.000195  |             |                   |
| Livestock and poultry          | 0.0795  |                                 |         |           |             |                   |
| Milk and its products          | 0.0263  |                                 |         |           |             |                   |
| Egg and its products           | 0.0236  |                                 |         |           |             |                   |
| Fish and shrimp                | 0.0301  |                                 |         |           |             |                   |
| Vegetable oil                  | 0.0327  | 2                               | China   | 0.065400  |             |                   |
| Animal oil                     | 0.0087  |                                 |         |           |             |                   |
| Sugar, starch                  | 0.0044  |                                 |         |           |             |                   |
| Salt                           | 0.012   |                                 |         |           |             |                   |
| Soy sauce                      | 0.009   |                                 |         |           |             |                   |
| Total                          | 1.0286  |                                 |         | 1.839849  | 1.89        | 97.35%            |

**Table S9.** Dietary intake risk assessment of pyraclostrobin on the basis of the residues from 18 different refrigerated warehouses.

| Food classification            | Fi<br>(kg) | Reference<br>residue<br>Limit or<br>STMR | Sources | NMDI<br>(mg) | ADI (mg/kg) | Risk<br>quotient<br>(%) |
|--------------------------------|------------|------------------------------------------|---------|--------------|-------------|-------------------------|
| Rice and its products          | 0.2399     | 1                                        | China   | 0.239900     | ADI×63      |                         |
| Flour and its products         | 0.1385     | 1                                        | China   | 0.138500     |             |                         |
| Other grains                   | 0.0233     | 0.05                                     | China   | 0.001165     |             |                         |
| Tubers                         | 0.0495     | 0.2                                      | China   | 0.009900     |             |                         |
| Dried beans and their products | 0.016      |                                          |         |              |             |                         |
| Dark vegetables                | 0.0915     | 3                                        | China   | 0.274500     |             |                         |
| Light vegetable                | 0.1837     | 5                                        | China   | 0.91850      |             |                         |
| Pickles                        | 0.0103     |                                          |         |              |             |                         |
| Fruits                         | 0.0457     | 0.03                                     | China   | 0.001371     |             |                         |
| Nuts                           | 0.0039     |                                          |         |              |             |                         |
| Livestock and poultry          | 0.0795     |                                          |         |              |             |                         |
| Milk and its products          | 0.0263     |                                          |         |              |             |                         |
| Egg and its products           | 0.0236     |                                          |         |              |             |                         |
| Fish and shrimp                | 0.0301     |                                          |         |              |             |                         |
| Vegetable oil                  | 0.0327     | 0.4                                      | China   | 0.013080     |             |                         |
| Animal oil                     | 0.0087     |                                          |         |              |             |                         |
| Sugar, starch                  | 0.0044     | 0.4                                      | China   | 0.000880     |             |                         |
| Salt                           | 0.012      | 0.4                                      | China   | 0.060000     |             |                         |
| Soy sauce                      | 0.009      |                                          |         |              |             |                         |
| Total                          | 1.0286     |                                          |         | 1.657796     | 1.89        | 87.71%                  |



**Table S10.** Dietary intake risk assessment of difenoconazole on the basis of the residues from 18 different refrigerated warehouses.

| Food classification            | Fi<br>(kg) | Reference                   | Sources | NMDI<br>(mg) | ADI (mg/kg) | Risk<br>quotient<br>(%) |
|--------------------------------|------------|-----------------------------|---------|--------------|-------------|-------------------------|
|                                |            | residue<br>Limit or<br>STMR |         |              |             |                         |
| Rice and its products          | 0.2399     | 0.5                         | China   | 0.119950     | ADI×63      |                         |
| Flour and its products         | 0.1385     | 0.1                         | China   | 0.013850     |             |                         |
| Other grains                   | 0.0233     | 0.1                         | China   | 0.002330     |             |                         |
| Tubers                         | 0.0495     | 0.02                        | China   | 0.000990     |             |                         |
| Dried beans and their products | 0.016      |                             |         |              |             |                         |
| Dark vegetables                | 0.0915     | 2                           | China   | 0.183000     |             |                         |
| Light vegetable                | 0.1837     | 1                           | China   | 0.183700     |             |                         |
| Pickles                        | 0.0103     |                             |         |              |             |                         |
| Fruits                         | 0.0457     | 0.01                        | China   | 0.000457     |             |                         |
| Nuts                           | 0.0039     | 0.1                         | China   | 0.000390     |             |                         |
| Livestock and poultry          | 0.0795     |                             |         |              |             |                         |
| Milk and its products          | 0.0263     |                             |         |              |             |                         |
| Egg and its products           | 0.0236     |                             |         |              |             |                         |
| Fish and shrimp                | 0.0301     |                             |         |              |             |                         |
| Vegetable oil                  | 0.0327     | 0.2                         | China   | 0.006540     |             |                         |
| Animal oil                     | 0.0087     |                             |         |              |             |                         |
| Sugar, starch                  | 0.0044     |                             |         |              |             |                         |
| Salt                           | 0.012      |                             |         |              |             |                         |
| Soy sauce                      | 0.009      |                             |         |              |             |                         |
| Total                          | 1.0286     |                             |         | 0.570067     | 0.63        | 90.49%                  |

**Table S11.** Dietary intake risk assessment of thiophanate-methyl on the basis of the residues from the supermarket pear samples.

| Food classification            | Fi<br>(kg) | Reference<br>residue<br>Limit or<br>STMR | Sources | NMDI (mg) | ADI<br>(mg/kg) | Risk<br>quotient<br>(%) |
|--------------------------------|------------|------------------------------------------|---------|-----------|----------------|-------------------------|
|                                |            |                                          |         |           |                |                         |
| Rice and its products          | 0.2399     | 1                                        | China   | 0.239900  |                |                         |
| Flour and its products         | 0.1385     | 0.5                                      | China   | 0.069250  |                |                         |
| Other grains                   | 0.0233     |                                          |         |           |                |                         |
| Tubers                         | 0.0495     | 0.1                                      | China   | 0.004950  |                |                         |
| Dried beans and their products | 0.016      |                                          |         |           |                |                         |
| Dark vegetables                | 0.0915     | 3                                        | China   | 0.274500  |                |                         |
| Light vegetable                | 0.1837     | 0.5                                      | China   | 0.091850  |                |                         |
| Pickles                        | 0.0103     |                                          |         |           |                |                         |
| Fruits                         | 0.0457     | 0.16                                     | China   | 0.007312  | ADI×63         |                         |
| Nuts                           | 0.0039     | 0.05                                     | China   | 0.000195  |                |                         |
| Livestock and poultry          | 0.0795     |                                          |         |           |                |                         |
| Milk and its products          | 0.0263     |                                          |         |           |                |                         |
| Egg and its products           | 0.0236     |                                          |         |           |                |                         |
| Fish and shrimp                | 0.0301     |                                          |         |           |                |                         |
| Vegetable oil                  | 0.0327     | 0.1                                      | China   | 0.003270  |                |                         |
| Animal oil                     | 0.0087     |                                          |         |           |                |                         |
| Sugar, starch                  | 0.0044     |                                          |         |           |                |                         |
| Salt                           | 0.012      |                                          |         |           |                |                         |
| Soy sauce                      | 0.009      |                                          |         |           |                |                         |
| Total                          | 1.0286     |                                          |         | 0.691032  | 5.67           | 12.19%                  |

**Table S12.** Dietary intake risk assessment of tebuconazole on the basis of the residues from the supermarket pear samples.

| Food classification            | Fi (kg) | Reference residue Limit or STMR | Sources | NMDI (mg) | ADI (mg/kg) | Risk quotient (%) |
|--------------------------------|---------|---------------------------------|---------|-----------|-------------|-------------------|
| Rice and its products          | 0.2399  | 0.1                             | China   | 0.023990  | ADI×63      |                   |
| Flour and its products         | 0.1385  | 2                               | China   | 0.277000  |             |                   |
| Other grains                   | 0.0233  | 0.05                            | China   | 0.001165  |             |                   |
| Tubers                         | 0.0495  |                                 |         |           |             |                   |
| Dried beans and their products | 0.016   |                                 |         |           |             |                   |
| Dark vegetables                | 0.0915  | 2                               | China   | 0.183000  |             |                   |
| Light vegetable                | 0.1837  | 7                               | China   | 1.285900  |             |                   |
| Pickles                        | 0.0103  |                                 |         |           |             |                   |
| Fruits                         | 0.0457  | 0.14                            | China   | 0.006398  |             |                   |
| Nuts                           | 0.0039  | 0.05                            | China   | 0.000195  |             |                   |
| Livestock and poultry          | 0.0795  |                                 |         |           |             |                   |
| Milk and its products          | 0.0263  |                                 |         |           |             |                   |
| Egg and its products           | 0.0236  |                                 |         |           |             |                   |
| Fish and shrimp                | 0.0301  |                                 |         |           |             |                   |
| Vegetable oil                  | 0.0327  | 2                               | China   | 0.065400  |             |                   |
| Animal oil                     | 0.0087  |                                 |         |           |             |                   |
| Sugar, starch                  | 0.0044  |                                 |         |           |             |                   |
| Salt                           | 0.012   |                                 |         |           |             |                   |
| Soy sauce                      | 0.009   |                                 |         |           |             |                   |
| Total                          | 1.0286  |                                 |         | 1.843048  | 1.89        | 97.52%            |

**Table S13.** Dietary intake risk assessment of pyraclostrobin on the basis of the residues from the supermarket pear samples.

| Food classification            | Fi (kg) | Reference residue Limit or STMR | Sources | NMDI (mg) | ADI (mg/kg) | Risk quotient (%) |
|--------------------------------|---------|---------------------------------|---------|-----------|-------------|-------------------|
| Rice and its products          | 0.2399  | 1                               | China   | 0.239900  |             |                   |
| Flour and its products         | 0.1385  | 1                               | China   | 0.138500  |             |                   |
| Other grains                   | 0.0233  | 0.05                            | China   | 0.001165  |             |                   |
| Tubers                         | 0.0495  | 0.2                             | China   | 0.009900  |             |                   |
| Dried beans and their products | 0.016   |                                 |         |           |             |                   |
| Dark vegetables                | 0.0915  | 3                               | China   | 0.274500  |             |                   |
| Light vegetable                | 0.1837  | 5                               | China   | 0.91850   |             |                   |
| Pickles                        | 0.0103  |                                 |         |           |             |                   |
| Fruits                         | 0.0457  | 0.51                            | China   | 0.023307  | ADI×63      |                   |
| Nuts                           | 0.0039  |                                 |         |           |             |                   |
| Livestock and poultry          | 0.0795  |                                 |         |           |             |                   |
| Milk and its products          | 0.0263  |                                 |         |           |             |                   |
| Egg and its products           | 0.0236  |                                 |         |           |             |                   |
| Fish and shrimp                | 0.0301  |                                 |         |           |             |                   |
| Vegetable oil                  | 0.0327  | 0.4                             | China   | 0.013080  |             |                   |
| Animal oil                     | 0.0087  |                                 |         |           |             |                   |
| Sugar, starch                  | 0.0044  | 0.4                             | China   | 0.000880  |             |                   |
| Salt                           | 0.012   | 0.4                             | China   | 0.060000  |             |                   |
| Soy sauce                      | 0.009   |                                 |         |           |             |                   |
| Total                          | 1.0286  |                                 |         | 1.679732  | 1.89        | 88.87%            |

**Table S14.** Dietary intake risk assessment of difenoconazole on the basis of the residues from the supermarket pear samples.

| Food classification            | Fi<br>(kg) | Reference        |            | NMDI<br>(mg) | ADI (mg/kg) | Risk<br>quotient<br>(%) |
|--------------------------------|------------|------------------|------------|--------------|-------------|-------------------------|
|                                |            | residue<br>Limit | or<br>STMR |              |             |                         |
| Rice and its products          | 0.2399     | 0.5              | China      | 0.119950     | ADI×63      |                         |
| Flour and its products         | 0.1385     | 0.1              | China      | 0.013850     |             |                         |
| Other grains                   | 0.0233     | 0.1              | China      | 0.002330     |             |                         |
| Tubers                         | 0.0495     | 0.02             | China      | 0.000990     |             |                         |
| Dried beans and their products | 0.016      |                  |            |              |             |                         |
| Dark vegetables                | 0.0915     | 2                | China      | 0.183000     |             |                         |
| Light vegetable                | 0.1837     | 1                | China      | 0.183700     |             |                         |
| Pickles                        | 0.0103     |                  |            |              |             |                         |
| Fruits                         | 0.0457     | 0.27             | China      | 0.012339     |             |                         |
| Nuts                           | 0.0039     | 0.1              | China      | 0.000390     |             |                         |
| Livestock and poultry          | 0.0795     |                  |            |              |             |                         |
| Milk and its products          | 0.0263     |                  |            |              |             |                         |
| Egg and its products           | 0.0236     |                  |            |              |             |                         |
| Fish and shrimp                | 0.0301     |                  |            |              |             |                         |
| Vegetable oil                  | 0.0327     | 0.2              | China      | 0.006540     |             |                         |
| Animal oil                     | 0.0087     |                  |            |              |             |                         |
| Sugar, starch                  | 0.0044     |                  |            |              |             |                         |
| Salt                           | 0.012      |                  |            |              |             |                         |
| Soy sauce                      | 0.009      |                  |            |              |             |                         |
| Total                          | 1.0286     |                  |            | 0.581949     | 0.63        | 92.37%                  |

**Table S15.** The Dietary risk assessment (chronic risk) of the five fungicides in pears.

| Sources         | fungicides          | ADI<br>(mg/kg bw) | ARfD<br>(mg/kg bw) | STMRI<br>(mg/kg) | HR<br>(mg/kg) | IEDI<br>(mg/kg bw/day) | NESTI<br>(mg/kg bw) | RQc (%) | RQa (%) |
|-----------------|---------------------|-------------------|--------------------|------------------|---------------|------------------------|---------------------|---------|---------|
| Cold<br>storage | carbendazim         | 0.03              | 0.5                | 3.88             | 30.05         | 2.81E-03               | 2.18 E-2            | 9.38    | 4.36    |
|                 | tebuconazole        | 0.03              | 0.03               | 0.07             | 0.55          | 5.08E-05               | 3.99E-4             | 0.17    | 1.33    |
|                 | thiophanate-methyl, | 0.09              | 0.5                | 0.05             | 13.55         | 3.63E-05               | 9.83 E-3            | 0.04    | 1.97    |
|                 | pyraclostrobin      | 0.03              | 0.05               | 0.03             | 0.52          | 2.18E-05               | 3.77 E-4            | 0.07    | 0.75    |
|                 | difenoconazole      | 0.01              | 0.3                | 0.01             | 0.28          | 7.25E-06               | 2.03 E-4            | 0.07    | 0.07    |
| Market          | carbendazim         | 0.03              | 0.5                | 0.16             | 5.68          | 1.16E-04               | 4.12E-3             | 0.39    | 0.82    |
|                 | tebuconazole        | 0.03              | 0.03               | 0.14             | 2.08          | 1.02E-04               | 1.50 E-3            | 0.34    | 5.03    |
|                 | thiophanate-methyl, | 0.09              | 0.5                | 0.29             | 8.44          | 2.10 E-04              | 6.12 E-3            | 0.23    | 1.22    |
|                 | pyraclostrobin      | 0.03              | 0.05               | 0.51             | 45.93         | 3.70 E-04              | 3.33E-2             | 1.23    | 66.63   |
|                 | difenoconazole      | 0.01              | 0.3                | 0.27             | 23.04         | 1.96 E-04              | 1.67 E-2            | 1.96    | 5.57    |
